# Supplementary material for: Gas-phase esterification of cellulose nanocrystal aerogels for colloidal dispersion in apolar solvents
Source: Royal Society of Chemistry journal article supplement (doi:10.1039/c3sm52062e), 2013-01-01
Supplement: c3sm52062e.pdf [file c3sm52062e.pdf]

## Supplementary informations

### **Gas-Phase Esterification of Cellulose Nanocrystals Aerogels for Colloidal Dispersion in Apolar Solvents**

*Matthieu Fumagalli, Francisco Sanchez, Sonia Molina Boisseau and Laurent Heux.\**

Centre de Recherches sur les Macromolécules Végétales (CERMAV-CNRS), BP 53, F-38041  
Grenoble Cedex 9, France, affiliated with the Université de Grenoble, member of the Institut  
de Chimie Moléculaire de Grenoble (ICMG) and member of the PolyNat Carnot Institute

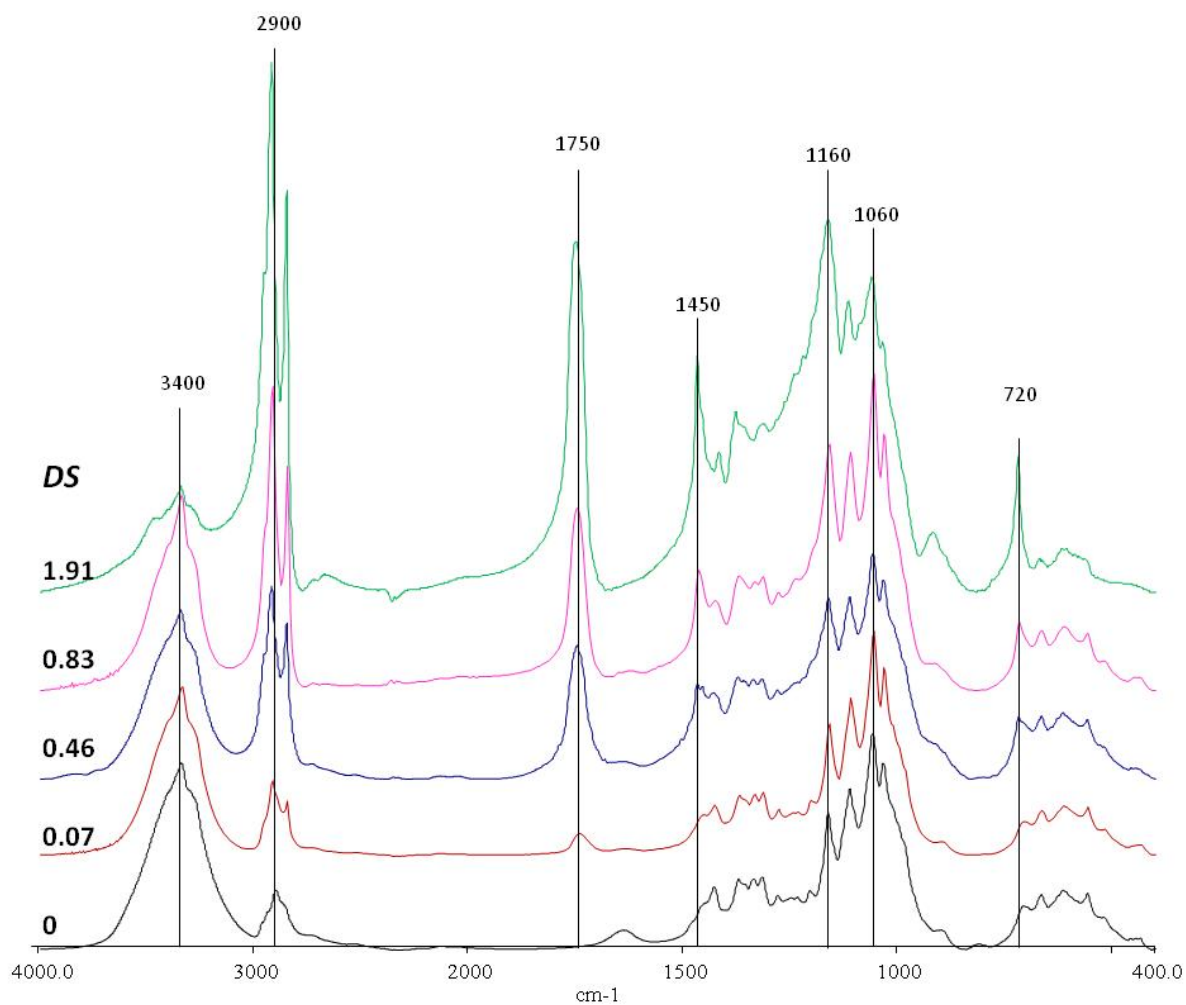

**Figure S1:** FTIR spectra of CNC aerogel fragments palmitoylated in the gas-phase with *DS* ranging from 0 to 1.91.

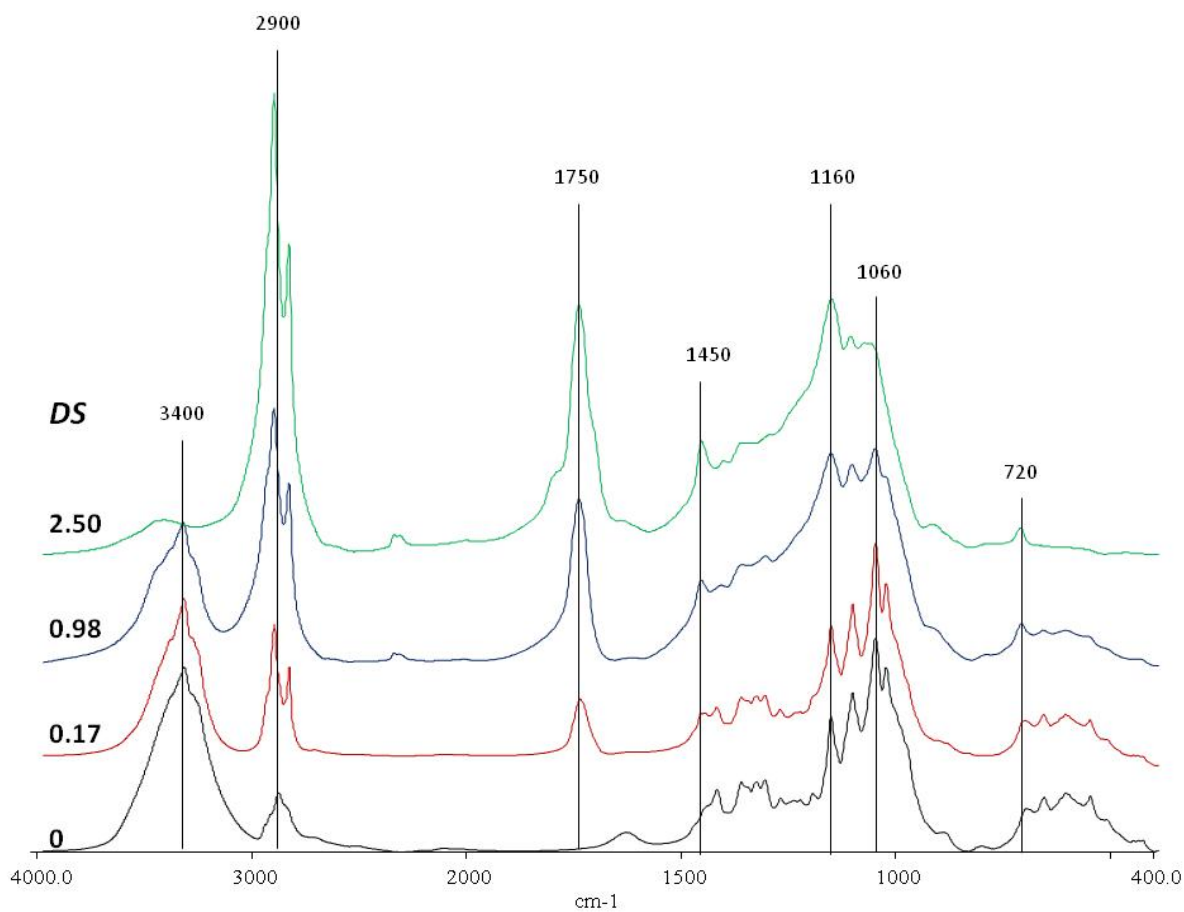

**Figure S2:** FTIR spectra of CNC aerogel fragments palmitoylated in DMF with *DS* ranging from 0 to 2.50.
